# Supplementary material for: Chronic high fat feeding restricts islet mRNA translation initiation independently of ER stress via DNA damage and p53 activation
Source: PubMed Central journal article supplement (PMC5476640; doi:10.1038/s41598-017-03869-5), 2017-06-19
Supplement: 41598_2017_3869_MOESM1_ESM.pdf [file 41598_2017_3869_MOESM1_ESM.pdf]

**Chronic high fat feeding restricts islet mRNA translation initiation independently of ER stress via DNA damage and p53 activation**

Masayuki Hatanaka<sup>1,5,6,7</sup>, Emily Anderson-Baucum<sup>2,6</sup>, Alexander Lakhter<sup>1,5,6</sup>,  
Tatsuyoshi Kono<sup>2,6</sup>, Bernhard Maier<sup>1,6</sup>, Sarah A. Tersey<sup>1,6</sup>, Yukio Tanizawa<sup>7</sup>, Carmella Evans-  
Molina<sup>2,3,4,5,6</sup>,  
Raghavendra G. Mirmira<sup>1-6</sup>, and Emily K. Sims\*<sup>1,5,6</sup>

<sup>1</sup>Departments of Pediatrics, <sup>2</sup>Medicine, <sup>3</sup>Biochemistry and Molecular Biology, <sup>4</sup>Cellular and Integrative Physiology, the <sup>5</sup>Herman B Wells Center for Pediatric Research, and the <sup>6</sup>Center for Diabetes and Metabolic Diseases, Indiana University School of Medicine, Indianapolis, IN, USA  
<sup>7</sup>Division of Endocrinology, Metabolism, Hematological Sciences and Therapeutics, Yamaguchi University Graduate School of Medicine, Yamaguchi, Japan

**\*To whom correspondence should be addressed:** Emily K. Sims, Indiana University School of Medicine, 635 Barnhill Drive, MS2031, Indianapolis, IN 46202, USA; Tel: (317) 944-3889; Fax (317) 944-3882. Email: [eksims@iu.edu](mailto:eksims@iu.edu).

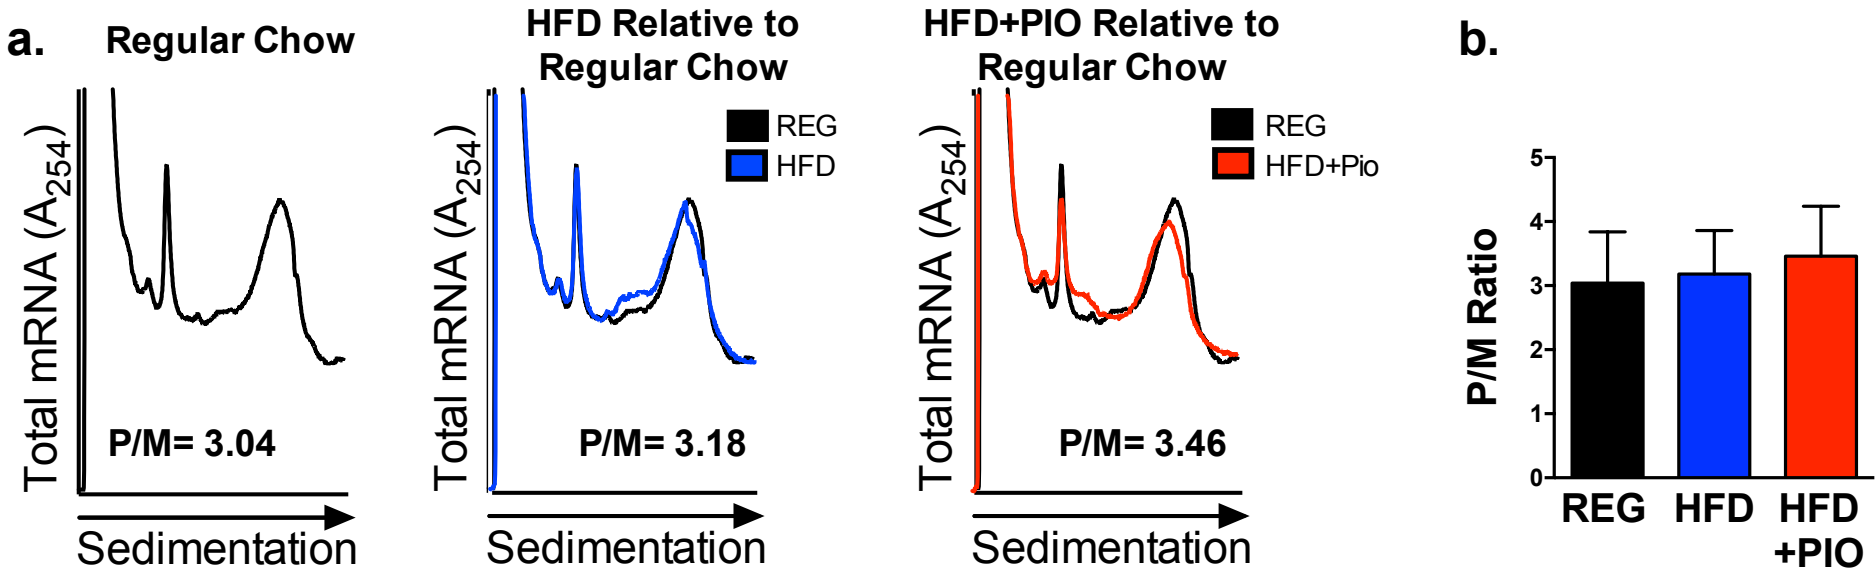

**Supplemental Figure 1. HFD does not induce changes in global islet translation initiation in mice on a C57BLKS/J background.** PRP analysis was performed on islets from C57BLKS/J mice that had been treated with HFD for a 16 week period. **a.** Representative global profiles for different treatment groups. **b.** Quantification of P/M ratios for each group.

| Seq ID  | Seq Name | REG    |        |        |        | HFD    |        |        |        | HFD + PIO |        |        |        | Description                                                                      |
|---------|----------|--------|--------|--------|--------|--------|--------|--------|--------|-----------|--------|--------|--------|----------------------------------------------------------------------------------|
| 2257190 | Bax      | 0.116  | 0.087  | 0.217  | 0.023  | 0.056  | 0.121  | 0.130  | 0.338  | 0.253     | 0.159  | 0.316  | 0.243  | Mus musculus BCL2-associated X protein (Bax), [NM_007527]                        |
| 2269283 | Bbc3     | -0.431 | -0.286 | 0.020  | -0.356 | -0.235 | -0.462 | -0.388 | -0.021 | -0.045    | -0.217 | -0.595 | -0.529 | Mus musculus BCL2 binding component 3 (Bbc3) [NM_133234]                         |
| 2275795 | Noxa1    | 0.416  | 0.209  | 0.360  | -0.266 | 1.628  | 0.039  | 0.196  | -0.168 | 0.503     | 0.043  | 0.758  | -0.039 | Mus musculus NADPH oxidase activator 1 (Noxa1), transcript variant 1 [NM_172204] |
| 2294288 | Perp     | -1.139 | -0.675 | -1.010 | -0.926 | -1.085 | -1.052 | -0.794 | -1.352 | -1.094    | -0.679 | -1.091 | -0.732 | Mus musculus PERP, TP53 apoptosis effector (Perp) [NM_022032]                    |
| 2305626 | Bid      | -0.319 | 0.033  | -0.054 | -0.090 | -0.222 | -0.227 | -0.026 | 0.381  | -0.263    | 0.173  | 1.344  | -0.343 | Mus musculus BH3 interacting domain death agonist (Bid) [NM_007544]              |

**Supplemental Figure 2. HFD does not induce activation of p53 apoptotic signaling pathways.** Relative expression of pro-apoptotic p53 target genes in microarray analysis of islets after 12 weeks of diet treatment. (n=4 per group)
